# Supplementary material for: Matrine derivative YF-18 inhibits lung cancer cell proliferation and migration through down-regulating Skp2
Source: PubMed Central journal article supplement (PMC5355299; doi:10.18632/oncotarget.14329), 2016-12-28
Supplement: oncotarget-08-11729-s001.pdf [file oncotarget-08-11729-s001.pdf]

## Matrine derivative YF-18 inhibits lung cancer cell proliferation and migration through down-regulating Skp2

### SUPPLEMENTARY MATERIALS

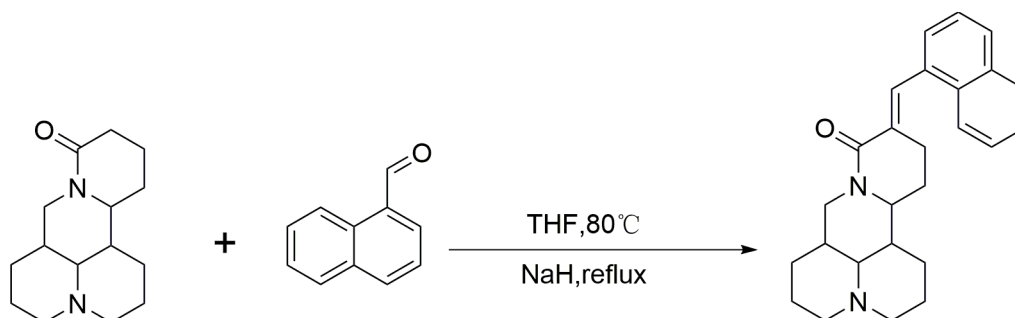

Scheme 1: Synthetic route for compound YF-18.

#### Synthesis and characterization of YF-18

Sodium hydride 2.8 g (116 mmol) was added into 50.0 ml anhydrous THF and then matrine 1.24g (5 mmol) was added. The reaction mixture was stirred with slow warming to 80 °C for 30min. 1-Naphthaldehyde 1.56 g (10 mmol) was added into the mixture. The reaction termination was monitored by TLC, then cooled down to room temperature and the solution was acidified with 3N HCl until pH reached to 7-8. The aqueous phase was extracted with dichloromethane (30 x 3), and the combined organic phases was washed with water, brine, and dried ( $\text{Na}_2\text{SO}_4$ ) sequentially, then filtered and evaporated under reduced pressure to give a yellow residue. Finally, the yellow residue was purified with silica gel column chromatography (petroleum ether/ethyl acetate = 1:1) to give compound YF-18.

#### Characterization of YF-18

White solid (49% yield), m.p. 173.5-176.3 °C;  $^1\text{H}$  NMR (600 MHz,  $\text{CD}_3\text{Cl}$ ):  $\delta$  ppm 8.22 (s, 1H), 8.04~8.00 (m, 1H), 7.90~7.87 (m, 1H), 7.83 (d,  $J = 8.4$  Hz, 1H), 7.54~7.51 (m, 2H), 7.48 (t,  $J = 7.8$  Hz, 1H), 7.33 (d,  $J = 7.2$  Hz, 1H), 4.59 (dd,  $J = 4.2$  Hz,  $J = 12.6$  Hz, 1H), 4.02~3.97 (m, 1H), 3.28 (t,  $J = 12.6$  Hz, 1H), 2.92~2.84 (m, 2H), 2.73~2.68 (m, 1H), 2.42~2.35 (m, 1H), 2.19 (s, 1H), 2.12~2.05 (m, 1H), 1.92~1.76 (m, 3H), 1.71~1.57 (m, 4H), 1.53~1.42 (m, 4H), 1.36~1.26 (m, 2H);  $^{13}\text{C}$  NMR (150 MHz,  $\text{CD}_3\text{Cl}$ ):  $\delta$  ppm 164.70, 133.65, 133.47, 132.91, 132.62, 131.92, 128.39, 128.14, 126.63, 126.18, 126.02, 125.08 (2C), 63.82, 57.23 (2C), 53.98, 42.85, 42.65, 35.64, 27.80, 26.39, 26.23, 23.44, 21.19, 20.77; MS,  $m/z$ : 386.99 (M<sup>+</sup>). HRMS: calcd for  $\text{C}_{26}\text{H}_{30}\text{N}_2\text{O}$  (M+H)<sup>+</sup>, 386.2413; found, 387.2489.

### SUPPLEMENTARY FIGURE AND TABLE

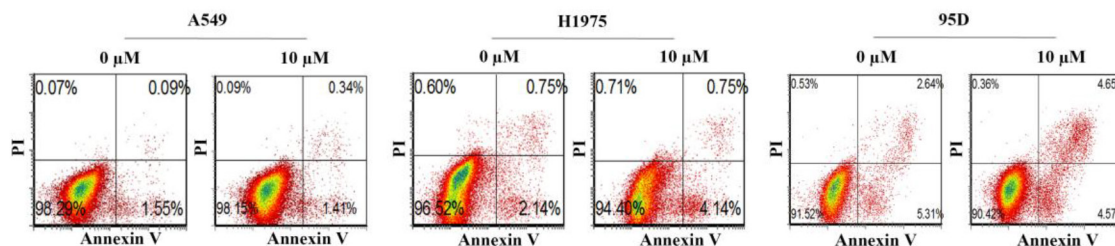

Supplementary Figure 1: YF-18 treatment could not induce cell apoptosis in A549, H1975, and 95D lung cancer cells.

Supplementary Table 1: Substrates of Skp2

| Substrate  | Function                            | Regulation                                                      |
|------------|-------------------------------------|-----------------------------------------------------------------|
| p27        | Cell cycle inhibition               | Skp2 induces the degradation of p27 [1]                         |
| E-cadherin | Cell migration regulation           | Skp2 induces the degradation of E-cadherin [2]                  |
| p57        | Cell cycle inhibition               | Skp2 induces the degradation of p57 [3]                         |
| p21        | Cell cycle inhibition               | Skp2 induces the degradation of p21 [4]                         |
| p130       | Cell cycle inhibition               | Skp2 induces the degradation of p130 [5]                        |
| Smad4      | Cell cycle arrest                   | Skp2 induces the degradation of cancer-derived Smad4 mutants[6] |
| CDK9       | Transcriptional elongation          | Skp2 triggers the degradation of CDK9 [7]                       |
| Myc        | Cell cycle regulation and Apoptosis | Skp2 triggers the degradation of Myc [8]                        |
| FOXO1      | Apoptosis                           | Skp2 triggers the degradation of FOXO1 [9]                      |
| MKP1       | ERK signaling                       | Skp2 triggers the degradation of MKP1 [10]                      |
| TOB1       | Cell cycle inhibition               | Skp2 induces the degradation of TOB1 [11]                       |
| Brca-2     | DNA repair                          | Skp2 triggers the degradation of Brca-2                         |
| CyclinD    | Cell cycle regulation               | Skp2 induces the degradation of CyclinD [4]                     |
| CyclinE    | Cell cycle regulation               | Skp2 induces the degradation of CyclinE [12]                    |
| Orc1p      | DNA replication                     | Skp2 triggers the degradation of Orc1p [13]                     |
| E2F1       | Cell cycle regulation/Apoptosis     | Skp2 induces the degradation of E2F1 [14]                       |
| MEF        | Cell cycle regulation               | Skp2 induces the degradation of MEF [15]                        |
| Myb        | Cell cycle regulation               | Skp2 causes the degradation of Myb [16]                         |
| RASSF1A    | Cell cycle regulation               | Skp2 induces the degradation of RASSF1A [17]                    |
| Cdt1       | DNA replication                     | Skp2 triggers the degradation of Cdt1 [18]                      |
| Rag-2      | DNA recombination                   | Skp2 triggers the degradation of Rag-2 [19]                     |
| UBP43      | Type 1 IFN signaling                | Skp2 triggers the degradation of UBP43 [20]                     |

## REFERENCES

1. Tsvetkov LM, Yeh KH, Lee SJ, Sun H and Zhang H. p27(Kip1) ubiquitination and degradation is regulated by the SCF(Skp2) complex through phosphorylated Thr187 in p27. *Curr Biol.* 1999; 9:661-664.
2. Inuzuka H, Gao D, Finley LW, Yang W, Wan L, Fukushima H, Chin YR, Zhai B, Shaik S, Lau AW, Wang Z, Gygi SP, Nakayama K, Teruya-Feldstein J, Toker A, Haigis MC, et al. Acetylation-dependent regulation of Skp2 function. *Cell.* 2012; 150:179-193.
3. Kamura T, Hara T, Kotoshiba S, Yada M, Ishida N, Imaki H, Hatakeyama S, Nakayama K and Nakayama KI. Degradation of p57Kip2 mediated by SCFSkp2-dependent ubiquitylation. *Proc Natl Acad Sci U S A.* 2003; 100:10231-10236.
4. Yu ZK, Gervais JL and Zhang H. Human CUL-1 associates with the SKP1/SKP2 complex and regulates p21(CIP1/WAF1) and cyclin D proteins. *Proc Natl Acad Sci U S A.* 1998; 95:11324-11329.
5. Bhattacharya S, Garriga J, Calbo J, Yong T, Haines DS and Grana X. SKP2 associates with p130 and accelerates p130 ubiquitylation and degradation in human cells. *Oncogene.* 2003; 22:2443-2451.
6. Liang M, Liang YY, Wrighton K, Ungermannova D, Wang XP, Brunnicardi FC, Liu X, Feng XH and Lin X. Ubiquitination and proteolysis of cancer-derived Smad4 mutants by SCFSkp2. *Mol Cell Biol.* 2004; 24:7524-7537.
7. Kiernan RE, Emiliani S, Nakayama K, Castro A, Labbe JC, Lorca T, Nakayama Ki K and Benkirane M. Interaction between cyclin T1 and SCF(SKP2) targets CDK9 for ubiquitination and degradation by the proteasome. *Mol Cell Biol.* 2001; 21:7956-7970.
8. von der Lehr N, Johansson S, Wu S, Bahram F, Castell A, Cetinkaya C, Hydbring P, Weidung I, Nakayama K, Nakayama KI, Soderberg O, Kerppola TK and Larsson LG. The F-box protein Skp2 participates in c-Myc proteosomal

- degradation and acts as a cofactor for c-Myc-regulated transcription. *Mol Cell*. 2003; 11:1189-1200.
9. Huang H, Regan KM, Wang F, Wang D, Smith DI, van Deursen JM and Tindall DJ. Skp2 inhibits FOXO1 in tumor suppression through ubiquitin-mediated degradation. *Proc Natl Acad Sci U S A*. 2005; 102:1649-1654.
  10. Lin YW and Yang JL. Cooperation of ERK and SCFSkp2 for MKP-1 destruction provides a positive feedback regulation of proliferating signaling. *J Biol Chem*. 2006; 281:915-926.
  11. Hiramatsu Y, Kitagawa K, Suzuki T, Uchida C, Hattori T, Kikuchi H, Oda T, Hatakeyama S, Nakayama KI, Yamamoto T, Konno H and Kitagawa M. Degradation of Tob1 mediated by SCFSkp2-dependent ubiquitination. *Cancer Res*. 2006; 66:8477-8483.
  12. Fujita T, Liu W, Doihara H and Wan Y. An *in vivo* study of Cdh1/APC in breast cancer formation. *Int J Cancer*. 2009; 125:826-836.
  13. Mendez J, Zou-Yang XH, Kim SY, Hidaka M, Tansey WP and Stillman B. Human origin recognition complex large subunit is degraded by ubiquitin-mediated proteolysis after initiation of DNA replication. *Mol Cell*. 2002; 9:481-491.
  14. Su S, Chen X, Geng J, Mingos JT, Grossman G and Wilson EM. Melanoma antigen-A11 regulates substrate-specificity of Skp2-mediated protein degradation. *Molecular and cellular endocrinology*. 2016; 439:1-9.
  15. Liu Y, Hedvat CV, Mao S, Zhu XH, Yao J, Nguyen H, Koff A and Nimer SD. The ETS protein MEF is regulated by phosphorylation-dependent proteolysis via the protein-ubiquitin ligase SCFSkp2. *Mol Cell Biol*. 2006; 26:3114-3123.
  16. Kitagawa K, Kotake Y and Kitagawa M. Ubiquitin-mediated control of oncogene and tumor suppressor gene products. *Cancer Sci*. 2009; 100:1374-1381.
  17. Song MS, Song SJ, Kim SJ, Nakayama K, Nakayama KI and Lim DS. Skp2 regulates the antiproliferative function of the tumor suppressor RASSF1A via ubiquitin-mediated degradation at the G1-S transition. *Oncogene*. 2008; 27:3176-3185.
  18. Li X, Zhao Q, Liao R, Sun P and Wu X. The SCF(Skp2) ubiquitin ligase complex interacts with the human replication licensing factor Cdt1 and regulates Cdt1 degradation. *J Biol Chem*. 2003; 278:30854-30858.
  19. Jiang H, Chang FC, Ross AE, Lee J, Nakayama K, Nakayama K and Desiderio S. Ubiquitylation of RAG-2 by Skp2-SCF links destruction of the V(D)J recombinase to the cell cycle. *Mol Cell*. 2005; 18:699-709.
  20. Tokarz S, Berset C, La Rue J, Friedman K, Nakayama K, Nakayama K, Zhang DE and Lanker S. The ISG15 isopeptidase UBP43 is regulated by proteolysis via the SCFSkp2 ubiquitin ligase. *J Biol Chem*. 2004; 279:46424-46430.
